# Supplementary figures and images for: Prospective exploratory study to assess the safety and efficacy of aflibercept in cystoid macular oedema associated with retinitis pigmentosa
Source: HighWire-hosted journal article supplement (doi:10.1136/bjophthalmol-2019-315152), 2020-02-10

**Supplementary figure 1: Consort flow diagram**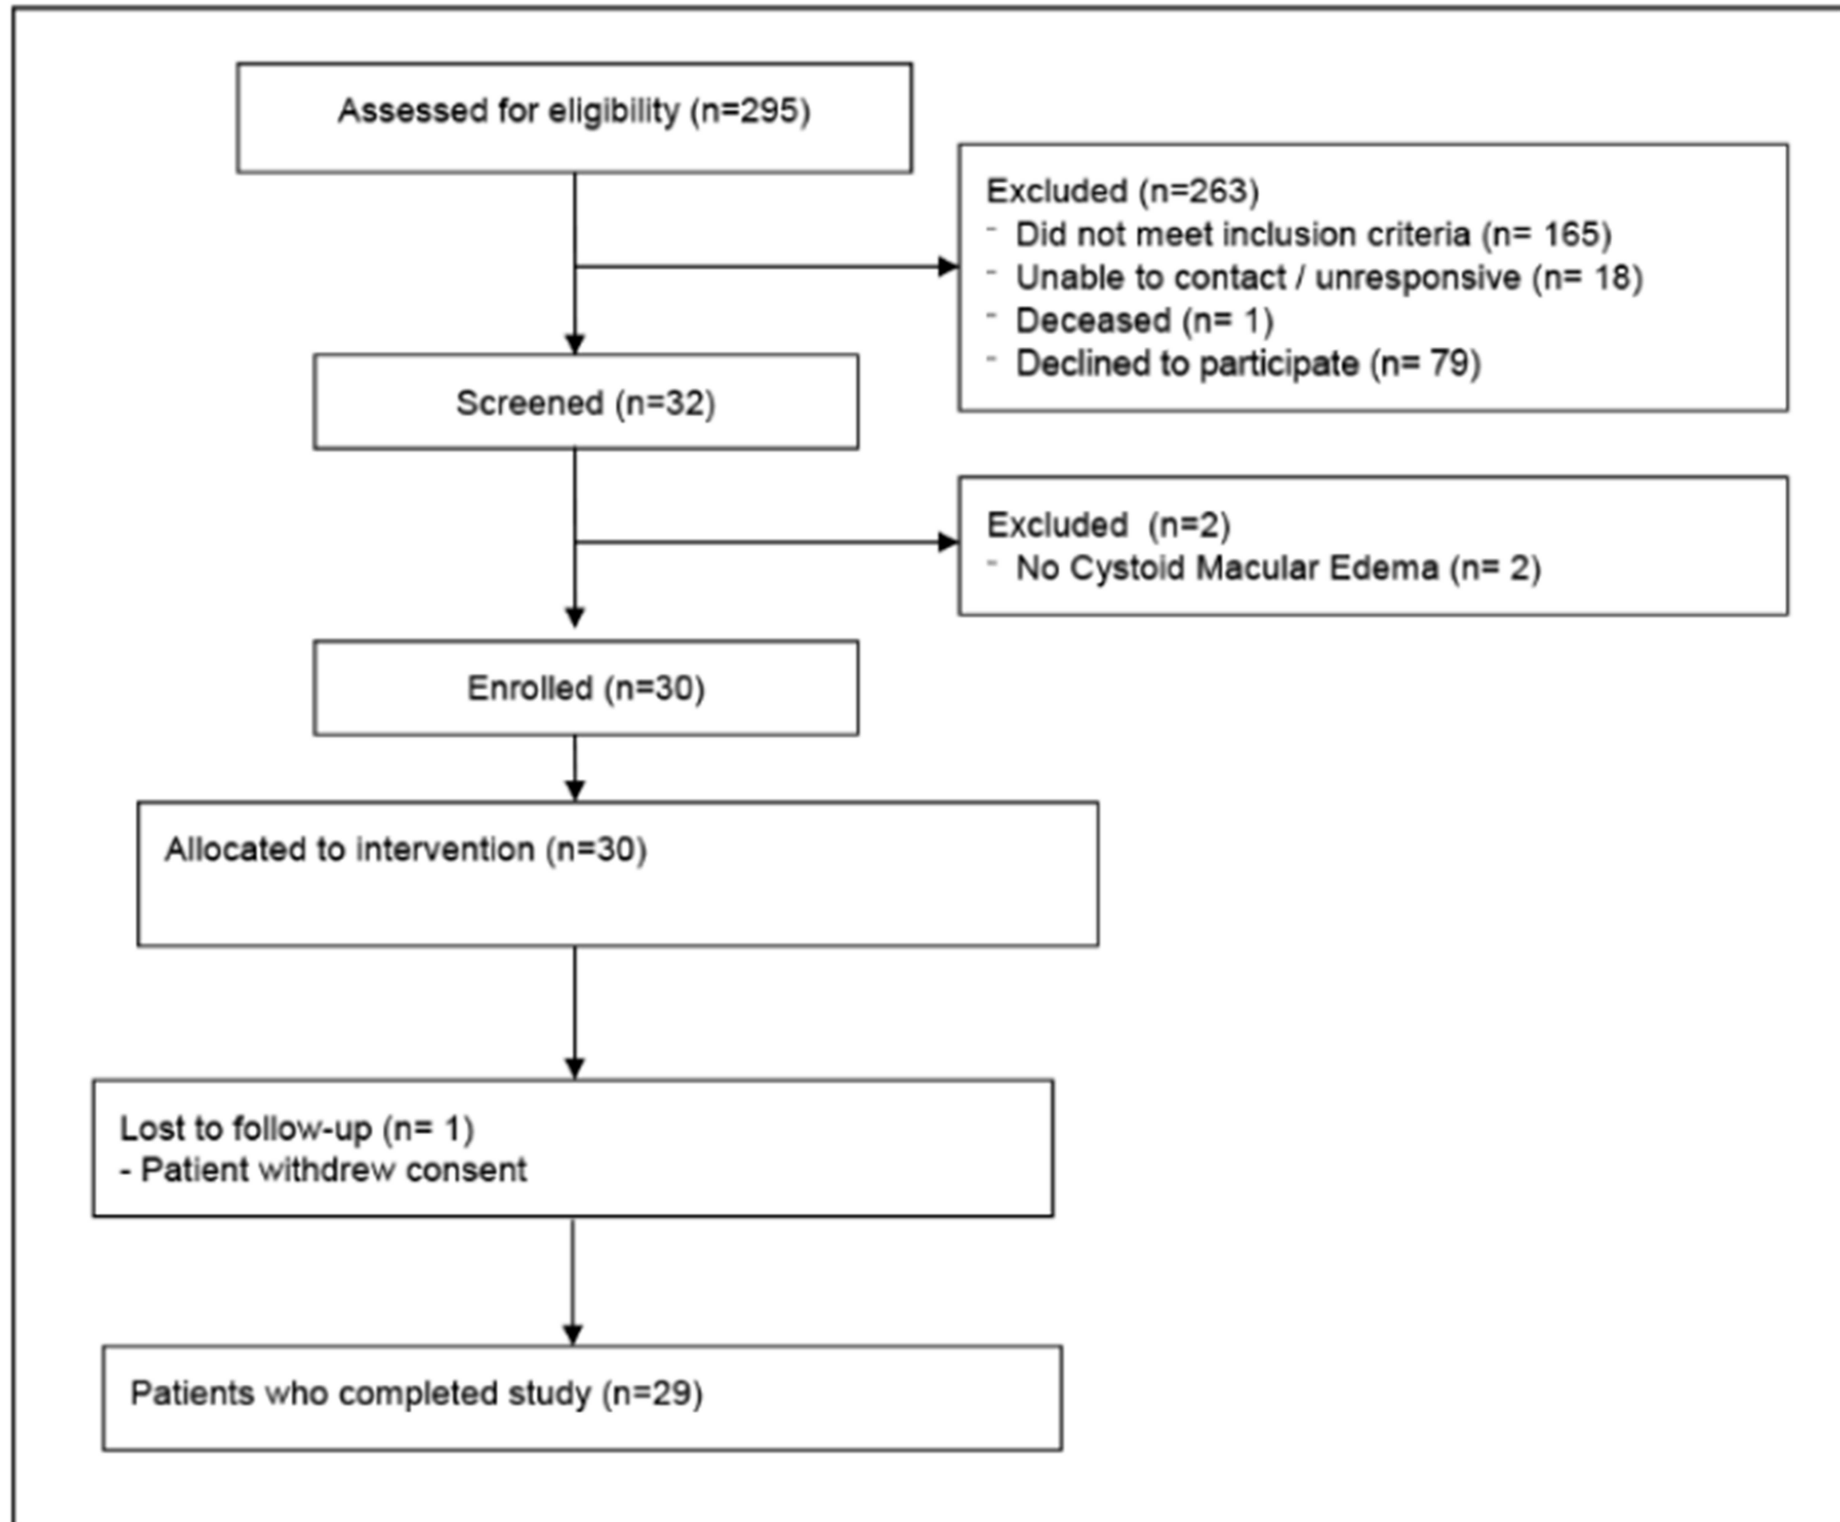

Supplement: bjophthalmol-2019-315152supp001_data_supplement.pdf [file bjophthalmol-2019-315152supp001_data_supplement.pdf]
